# Supplementary material for: A novel flatworm-specific gene implicated in reproduction in Macrostomum lignano
Source: PubMed Central journal article supplement (PMC5816591; doi:10.1038/s41598-018-21107-4), 2018-02-16
Supplement: 41598_2018_21107_MOESM1_ESM.pdf [file 41598_2018_21107_MOESM1_ESM.pdf]

## A novel flatworm-specific gene implicated in reproduction in *Macrostomum lignano*

Magda Grudniewska, Stijn Mouton, Margriet Grelling, Anouk H. G. Wolters, Jeroen Kuipers, Ben N. G. Giepmans, Eugene Berezikov

### Supplementary materials

**Supplementary Table 1. Characteristics of Mlig\_RNA\_3\_7\_DV1\_v3 transcriptome assembly.**

|                                                      | Transcriptional Units | Genes            | Core Genes      |
|------------------------------------------------------|-----------------------|------------------|-----------------|
| Number of transcripts                                | 143,648               | 153,985          | 90,195          |
| Total length                                         | 592 Mb                | 474 Mb           | 236 Mb          |
| Number of non-redundant sequences <sup>a</sup>       | 53,480                | 88,426           | 56,036          |
| Total length of non-redundant sequences <sup>a</sup> | 222 Mb                | 312 Mb           | 171 Mb          |
| Average transcript length                            | 4.1 kb                | 3.1 kb           | 2.6 kb          |
| Longest transcript                                   | 59,238 nt             | 53,263 nt        | 49,790 nt       |
| Transcripts with single trans-splicing site          | 29,559 (20.58%)       | 51,241 (33.28%)  | 27,078 (30.02%) |
| Transcripts with multiple trans-splicing sites       | 14,334 (9.98%)        | -                | -               |
| Transcripts with defined poly(A) site                | 102,301 (71.22%)      | 110,737 (71.91%) | 60,427 (67.00%) |
| TransRate score                                      | 0.2386                | 0.2592           | 0.3154          |
| Average gene length                                  | 10.2 kb               | 7.9 kb           | 5.5 kb          |
| Average number of introns per gene                   | 5.3                   | 4.8              | 4.0             |
| Average intron length                                | 1.4 kb                | 1.3 kb           | 1.1 kb          |
| Human homolog genes                                  | -                     | 8,913            | 8,543           |
| PFAM domains                                         | -                     | 6,201            | 5,975           |
| Eukaryotic BUSCOs (n=303)                            |                       |                  |                 |
| complete                                             | -                     | 298 (98.35%)     | 298 (98.35%)    |
| fragmented                                           | -                     | 2 (0.66%)        | 2 (0.66%)       |
| Missing                                              | -                     | 3 (0.99%)        | 3 (0.99%)       |

<sup>a</sup> Sequences with  $\geq 95\%$  identity at nucleotide level.

**Supplementary Table 2. Gene counts, fold changes and FDR for various gene expression comparisons, and classification of genes into categories.** Provided as a separate Excel file.

**Supplementary Table 3. Genes selected for the RNAi screen.**

| Gene                            | Forward primer       | Reversed primer      | Product size |
|---------------------------------|----------------------|----------------------|--------------|
| Mlig005580.g1                   | CTCATTGTGGTGCTGGAGTC | AAGCGGGAACCTAGGGAATA | 1049         |
| Mlig018764.g1                   | CCTTCATAGGAAGCGTGAGC | CATGTGACACTGCCTGACAA | 1071         |
| Mlig015516.g1                   | GGAGTAGGGCGGCATTTACT | TTGATTGCTGCTTTTTGTCG | 1350         |
| Mlig025071.g1                   | ATAAGGTGGCCATCATCAGC | GAATTGATTTGCGATCCAT  | 1020         |
| Mlig020950.g1,<br>Mlig020950.g2 | TAGCCCTGCTAAGGCAGGTA | CGATGTTGGCGTTTCTTCTT | 1099         |
| Mlig010408.g1,<br>Mlig010408.g2 | GTCAGTCATCTCGGCATTCA | CAGGACGTCGTTGCTATGAG | 1252         |

**Supplementary Table 4. Members of the *Mlig-sperm1* gene family.**

| Gene                        | % Identity | Aln. len. | E-value | Gene group  | Transcript Cluster | Protein Cluster        | Conserv.  |
|-----------------------------|------------|-----------|---------|-------------|--------------------|------------------------|-----------|
| <b>Mlig020950.g1</b>        | 100.00     | 635       | 0.0     | Germline    | MligTCv3c-5901.0   | <b>MligPCv3c-11292</b> | flatworms |
| Mlig020950.g2               | 99.37      | 635       | 0.0     | Germline    | MligTCv3c-5901.0   | MligPCv3c-11292        | flatworms |
| <b>Mlig009246.g1</b>        | 79.64      | 280       | 4e-173  | Germline    | MligTCv3c-19851.0  | <b>MligPCv3c-28017</b> | flatworms |
| Mlig009246.g3               | 79.64      | 280       | 4e-173  | Germline    | MligTCv3c-19851.0  | MligPCv3c-28017        | flatworms |
| Mlig009246.g2               | 79.64      | 280       | 5e-173  | Germline    | MligTCv3c-19851.0  | MligPCv3c-28017        | flatworms |
| <b>Mlig012325.g2</b>        | 55.97      | 243       | 5e-97   | Irradiation | MligTCv3c-5898.1   | <b>MligPCv3c-11289</b> | flatworms |
| Mlig012325.g4               | 55.97      | 243       | 6e-97   | Germline    | MligTCv3c-5898.2   | MligPCv3c-11289        | flatworms |
| Mlig012325.g3               | 55.97      | 243       | 6e-97   | Germline    | MligTCv3c-5898.2   | MligPCv3c-11289        | flatworms |
| <b>Mlig031710.g1</b>        | 51.22      | 246       | 9e-88   | Germline    | MligTCv3c-18949.1  | <b>MligPCv3c-26913</b> | flatworms |
| Mlig017805.g1               | 51.22      | 246       | 1e-87   | Germline    | MligTCv3c-18949.0  | MligPCv3c-26913        | flatworms |
| Mlig019621.g1               | 51.22      | 246       | 6e-87   | Irradiation | MligTCv3c-18949.2  | MligPCv3c-26913        | flatworms |
| Mlig012325.g1               | 63.06      | 157       | 1e-71   |             | MligTCv3c-5898.0   | MligPCv3c-11288        | flatworms |
| <b>Mlig029294.g2</b>        | 37.07      | 259       | 8e-53   | Germline    | MligTCv3c-10161.0  | <b>MligPCv3c-16206</b> | flatworms |
| Mlig029294.g1               | 37.07      | 259       | 8e-53   | Germline    | MligTCv3c-10161.3  | MligPCv3c-16206        | flatworms |
| Mlig013082.g1               | 37.07      | 259       | 2e-52   | Germline    | MligTCv3c-10161.1  | MligPCv3c-16206        | flatworms |
| <b>Mlig019406.g3</b>        | 39.75      | 239       | 3e-51   | Germline    | MligTCv3c-20308.0  | <b>MligPCv3c-28574</b> | flatworms |
| Mlig019406.g1               | 39.75      | 239       | 3e-51   | Germline    | MligTCv3c-20308.0  | MligPCv3c-28574        | flatworms |
| Mlig019406.g2               | 39.75      | 239       | 3e-51   | Germline    | MligTCv3c-20308.3  | MligPCv3c-28574        | flatworms |
| Mlig001515.g6               | 40.17      | 239       | 9e-50   | Germline    | MligTCv3c-20308.1  | MligPCv3c-28575        | flatworms |
| Mlig001515.g2               | 40.17      | 239       | 1e-49   | Germline    | MligTCv3c-20308.1  | MligPCv3c-28575        | flatworms |
| <b>Mlig000837.g18</b>       | 38.89      | 162       | 1e-34   | Irradiation | MligTCv3c-19549.0  | <b>MligPCv3c-27670</b> | flatworms |
| <b>Mlig019468.g4</b>        | 36.98      | 192       | 3e-34   | Germline    | MligTCv3c-5534.0   | <b>MligPCv3c-10878</b> | flatworms |
| Mlig019468.g2               | 36.98      | 192       | 3e-34   | Germline    | MligTCv3c-5534.0   | MligPCv3c-10878        | flatworms |
| Mlig019468.g1               | 36.98      | 192       | 3e-34   | Germline    | MligTCv3c-5534.0   | MligPCv3c-10878        | flatworms |
| Mlig019468.g5               | 36.98      | 192       | 3e-34   | Germline    | MligTCv3c-5534.1   | MligPCv3c-10878        | flatworms |
| Mlig000837.g12              | 38.89      | 162       | 5e-34   | Irradiation | MligTCv3c-19549.0  | <b>MligPCv3c-27670</b> | flatworms |
| Mlig000837.g5               | 38.89      | 162       | 6e-34   | Irradiation | MligTCv3c-19549.0  | MligPCv3c-27670        | flatworms |
| <b>Mlig023921.g1</b>        | 33.92      | 171       | 6e-27   | Irradiation | MligTCv3c-10246.1  | <b>MligPCv3c-16312</b> | flatworms |
| <b>Mlig018401.g2</b>        | 34.48      | 116       | 5e-17   | Germline    | MligTCv3c-9825.0   | <b>MligPCv3c-15783</b> | flatworms |
| Mlig004316.g2               | 34.48      | 116       | 5e-17   | Germline    | MligTCv3c-9825.0   | MligPCv3c-15783        | flatworms |
| Mlig004316.g1               | 34.48      | 116       | 5e-17   | Germline    | MligTCv3c-9825.0   | MligPCv3c-15783        | flatworms |
| Mlig018401.g3               | 36.44      | 118       | 1e-16   | Germline    | MligTCv3c-9825.0   | MligPCv3c-15783        | flatworms |
| <b>Mlig034150.g2</b>        | 30.37      | 135       | 2e-15   | Germline    | MligTCv3c-14983.1  | <b>MligPCv3c-21986</b> | flatworms |
| Mlig034150.g1               | 30.37      | 135       | 2e-15   | Germline    | MligTCv3c-14983.1  | MligPCv3c-21986        | flatworms |
| Mlig034150.g3               | 30.37      | 135       | 3e-15   | Germline    | MligTCv3c-14983.0  | MligPCv3c-21986        | flatworms |
| <b>dd_Smes_v1_55033_1_1</b> | 34.97      | 183       | 2e-31   |             |                    |                        |           |
| dd_Smes_v1_40403_1_1        | 37.93      | 145       | 3e-26   |             |                    |                        |           |
| dd_Smes_v1_1158_1_2         | 33.80      | 142       | 2e-19   |             |                    |                        |           |
| dd_Smes_v1_1158_1_1         | 33.80      | 142       | 2e-19   |             |                    |                        |           |
| dd_Smes_v1_23757_1_1        | 26.44      | 174       | 6e-18   |             |                    |                        |           |
| dd_Smes_v1_35536_1_1        | 32.37      | 173       | 4e-17   |             |                    |                        |           |
| <b>dd_Smed_v6_22487_0_1</b> | 30.59      | 170       | 4e-17   |             |                    |                        |           |
| dd_Smes_v1_11298_1_1        | 30.59      | 181       | 4e-17   |             |                    |                        |           |
| dd_Smes_v1_43688_1_1        | 30.59      | 170       | 3e-17   |             |                    |                        |           |

\* Genes in bold were used in constructing sequence alignment.

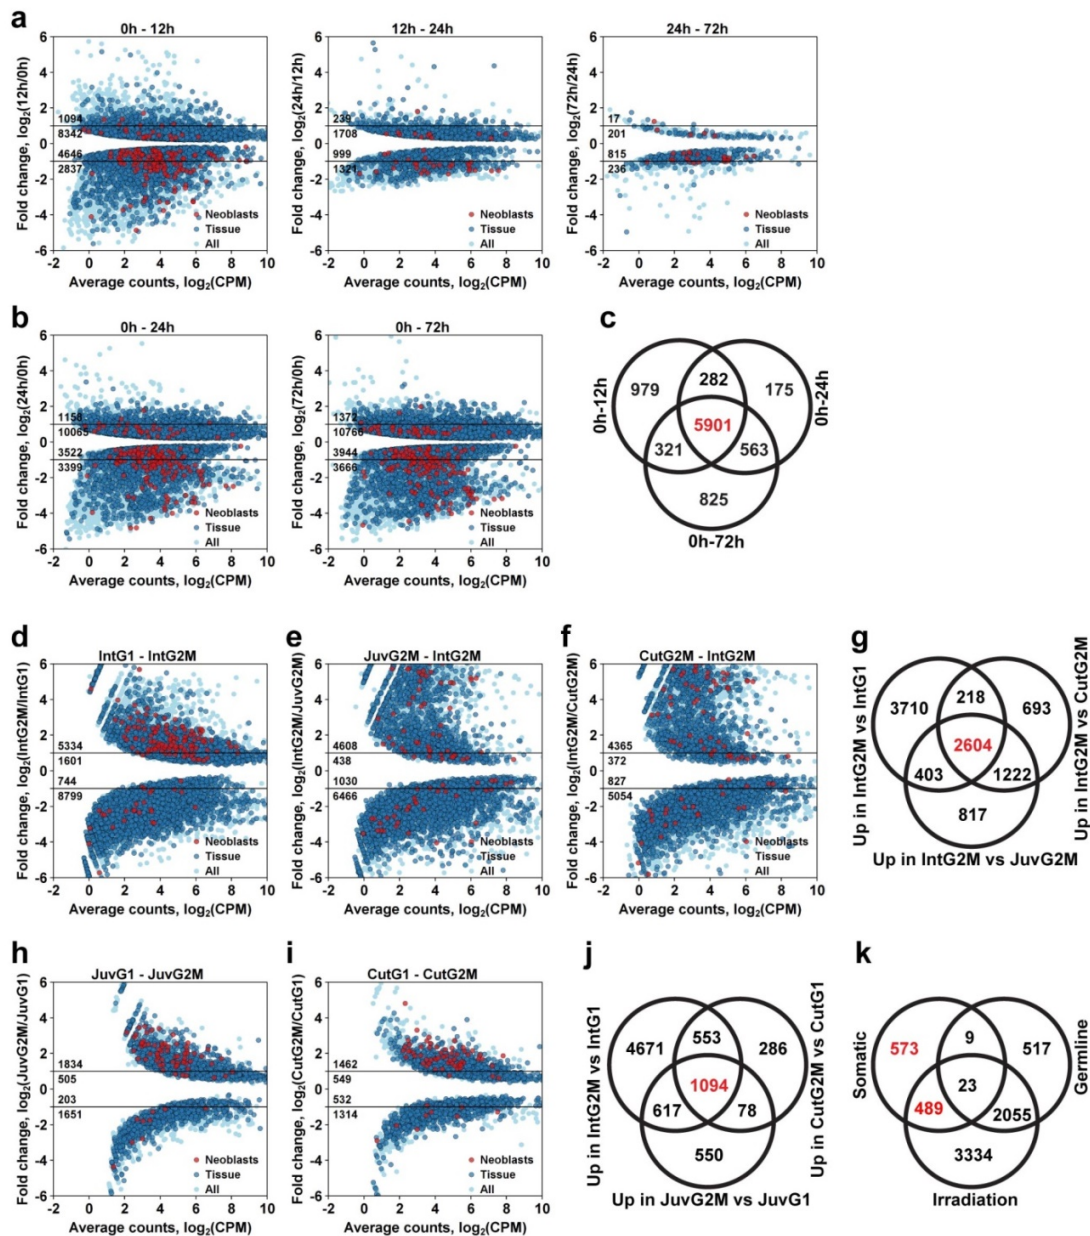

**Supplementary Figure 1. Reanalysis of RNA-seq data from Grudniewska et al. (2016) using Mlig\_RNA\_3\_7\_DV1\_v3 transcriptome assembly. (a - c)** Identification of differentially expressed genes based on  $\gamma$ -irradiation approach. **(a)** Temporal profile of differentially expressed genes between all three time points. **(b)** Genes differentially expressed between 0h and 24h, and 0h and 72h. **(c)** Venn diagram representation of the number of genes enriched in proliferating cells (indicated in red). **(d - k)** Identification of differentially expressed genes based on FACS approach. **(d)** Genes differentially expressed between differentiated (G1 phase of cell cycle, 2C DNA content) and proliferating (G2/M phase of cell cycle, 4C DNA content) cells of intact worms. **(e)** Genes differentially expressed between proliferating cells of juvenile and intact worms. **(f)** Genes differentially expressed between proliferating cells of cut and intact worms. **(g)** Venn diagram representation of the number of genes enriched in the germline (indicated in red). **(h)** Genes differentially expressed between differentiated and proliferating cells of juvenile worms. **(i)** Genes differentially expressed between differentiated and proliferating cells of cut worms. **(j)** Venn diagram representation of the number of genes enriched in somatic neoblasts (indicated in red). **(k)** Venn diagram representation of the number of genes enriched in somatic neoblasts based on both approaches: irradiation and FACS (indicated in red). Classification of genes as 'Neoblast' and 'Tissue' is based on homology to *S. mediterranea* genes from Wurtzel et al. (2015).

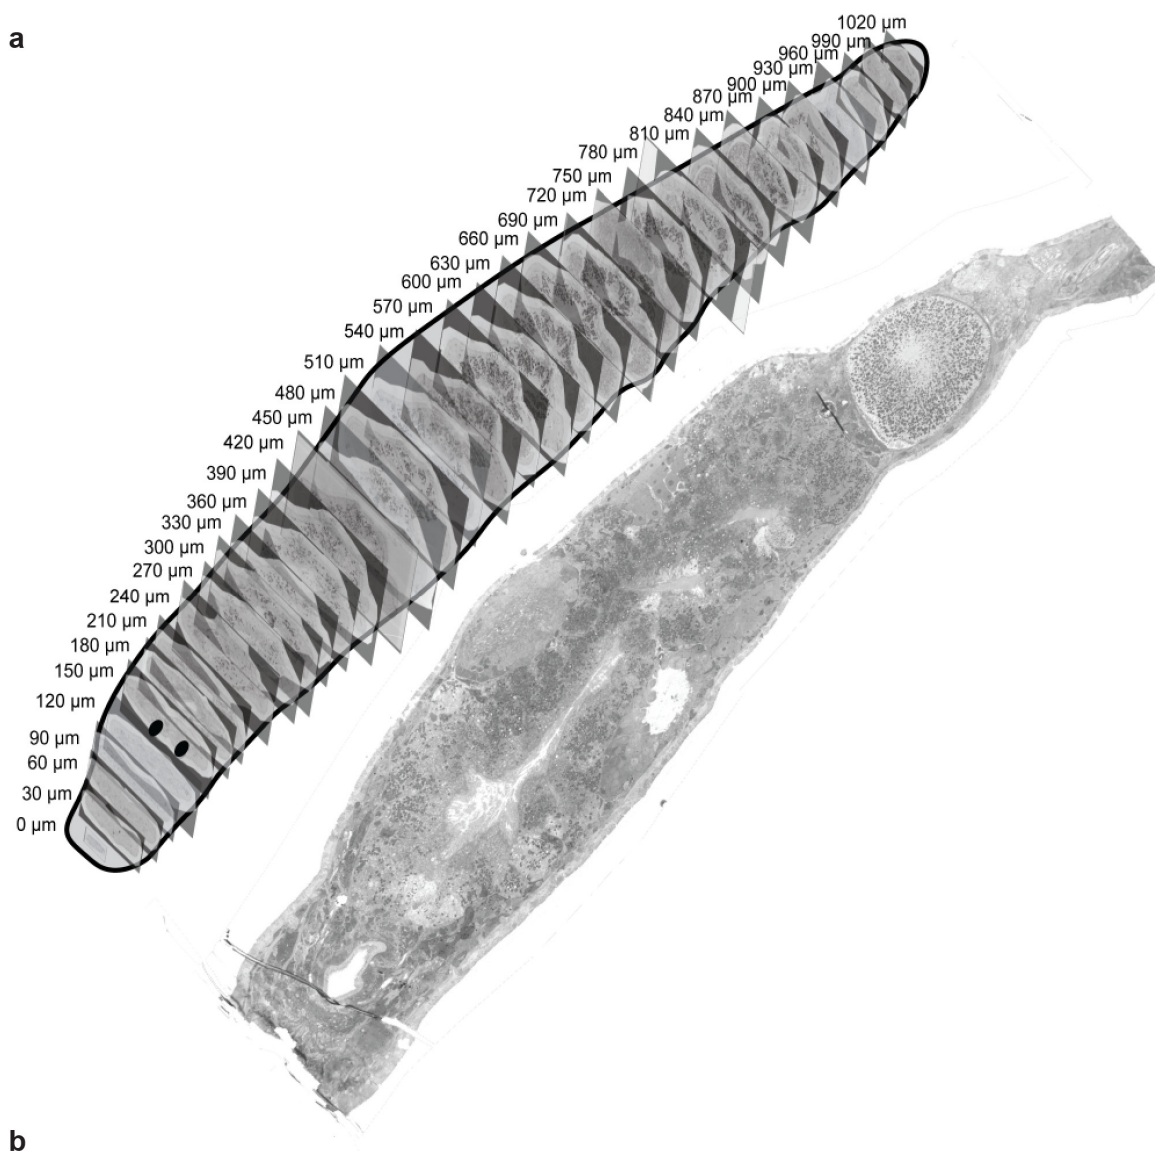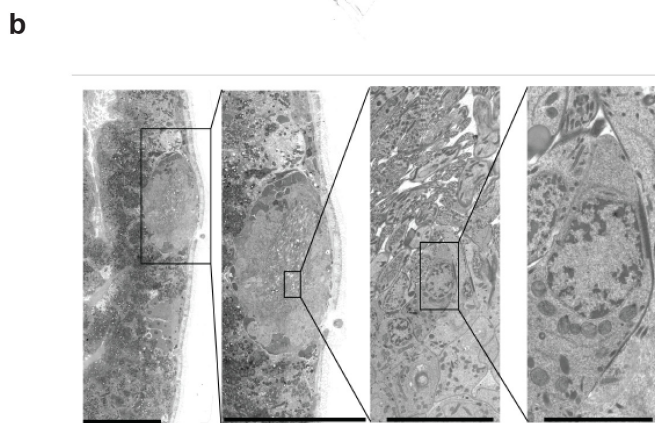

**Supplementary Figure 2. Nanotomy in *M. lignano*.** (a) One longitudinal section and 35 cross-sections through the entire adult animal with the 30  $\mu\text{m}$  intervals were made. (b) An illustration of different magnification levels. Scale bars are 100  $\mu\text{m}$ , 100  $\mu\text{m}$ , 10  $\mu\text{m}$ , and 3  $\mu\text{m}$ . The data are accessible at <http://www.nanotomy.org/OA/Macrostomum>

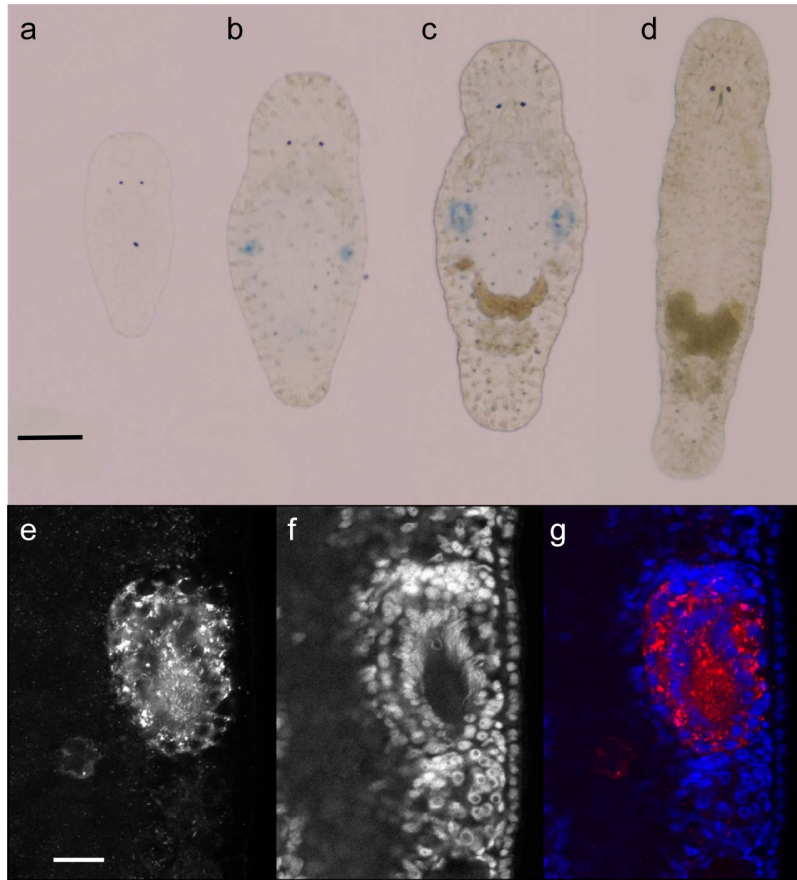

**Supplementary Figure 3. Expression pattern of the *Mlig-sperm1* gene.** (a-d) Whole mount *in situ* hybridization of *Mlig-sperm1* gene in a 1-day old hatchling (a), 4-days old juvenile (b), adult individual (c), and control WISH with sense *Mlig-sperm1* probe (d). (e-g) *Mlig-sperm1* FISH (e), with DAPI counterstain (f), and their overlay (g). This indicates the specific expression of *Mlig-sperm1* (red) within the testes and the lack of expression in the ovaries, which is represented by the dense cluster of DAPI-labeled (blue) nuclei under the testes. Scale bar: 100  $\mu$ m (a-d) and 25  $\mu$ m (e-g).



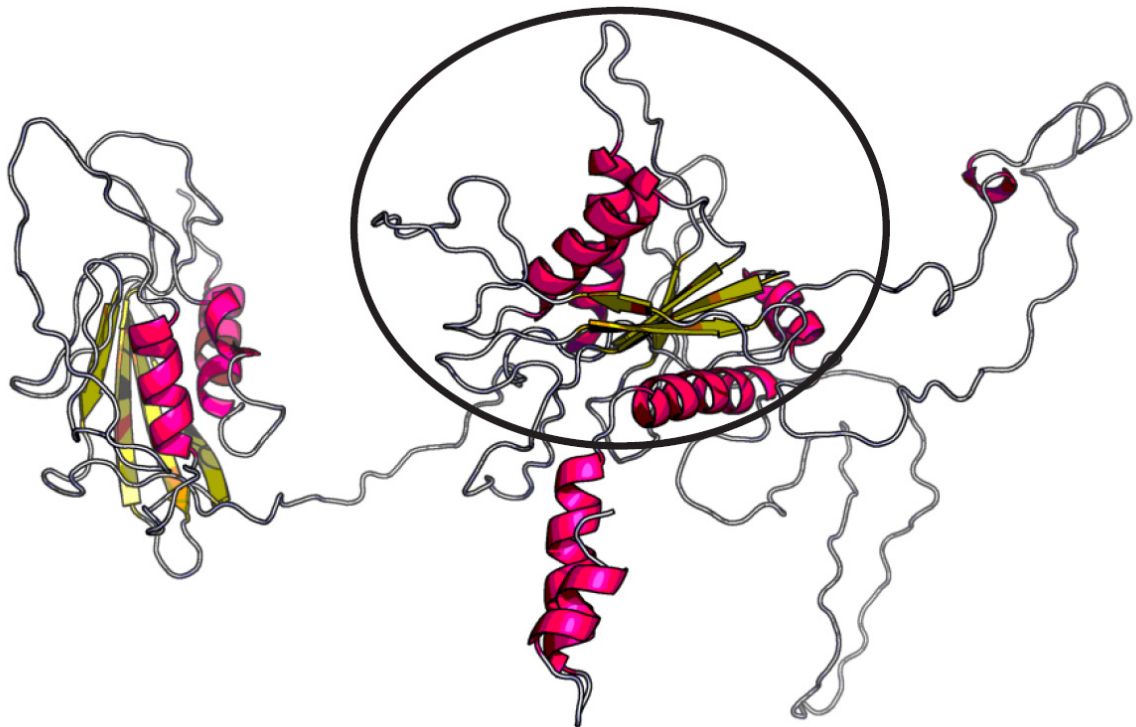

**Supplementary Figure 5. Predicted tertiary structure of Mlig-SPERM1 protein.** The conserved region of the protein is encircled.
